# Supplementary material for: Single-Molecule Characterization of the Interactions between Extracellular Chaperones and Toxic α-Synuclein Oligomers
Source: PubMed Central journal article supplement (PMC6024880; doi:10.1016/j.celrep.2018.05.074), 2018-06-19
Supplement: mmc1.pdf [file mmc1.pdf]

**Cell Reports, Volume 23**

**Supplemental Information**

**Single-Molecule Characterization  
of the Interactions between Extracellular  
Chaperones and Toxic  $\alpha$ -Synuclein Oligomers**

**Daniel R. Whiten, Dezaerae Cox, Mathew H. Horrocks, Christopher G. Taylor, Suman De, Patrick Flagmeier, Laura Tosatto, Janet R. Kumita, Heath Ecroyd, Christopher M. Dobson, David Klenerman, and Mark R. Wilson**

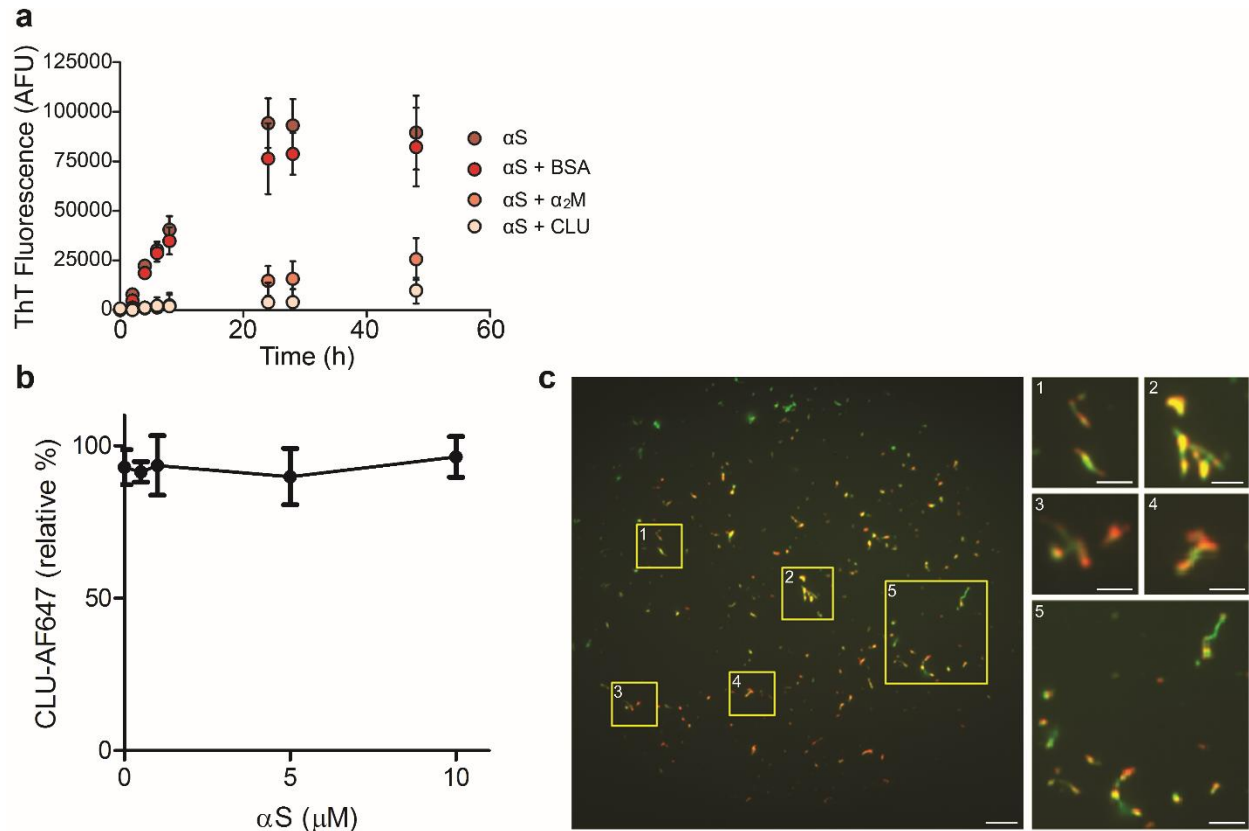

**Figure S1.** Related to Figures 1 and 2. **(a)**  $\alpha$ S (70  $\mu$ M) was incubated alone or with BSA (as a negative control),  $\alpha_2$ M or CLU (each at 0.7  $\mu$ M) for 48 h at 37  $^{\circ}$ C and 200 rpm shaking. The time points were taken during the reaction and the extent of aggregation was quantified by ThT (20  $\mu$ M) fluorescence using a Clariostar platereader (BMG LabTech; excitation 440-15 nm, emission 500-25 nm). Data shown are means  $\pm$  SD of three replicate treatments. **(b)** CLU-AF647 (100 nM) was incubated with shaking for 1 h with various concentrations of  $\alpha$ S fibrils (equivalent monomer concentrations are shown, diluted from a 70  $\mu$ M aggregation reaction incubated for 48 h). The absence of significant quenching was observed when the total fluorescence intensity of the solution was measured and found to be independent from the number of fibrils present. **(c)** TIRF microscopy was used to show that CLU can indeed bind to fibrils. Fibrils were identified using thioflavin T and are shown in green, CLU-AF647 is shown in red, coincidence appears yellow. Panels at right show larger versions of areas indicated by numbered yellow boxes. The scale bars are 2  $\mu$ m for the main panel, and 1  $\mu$ m for each of the smaller panels.

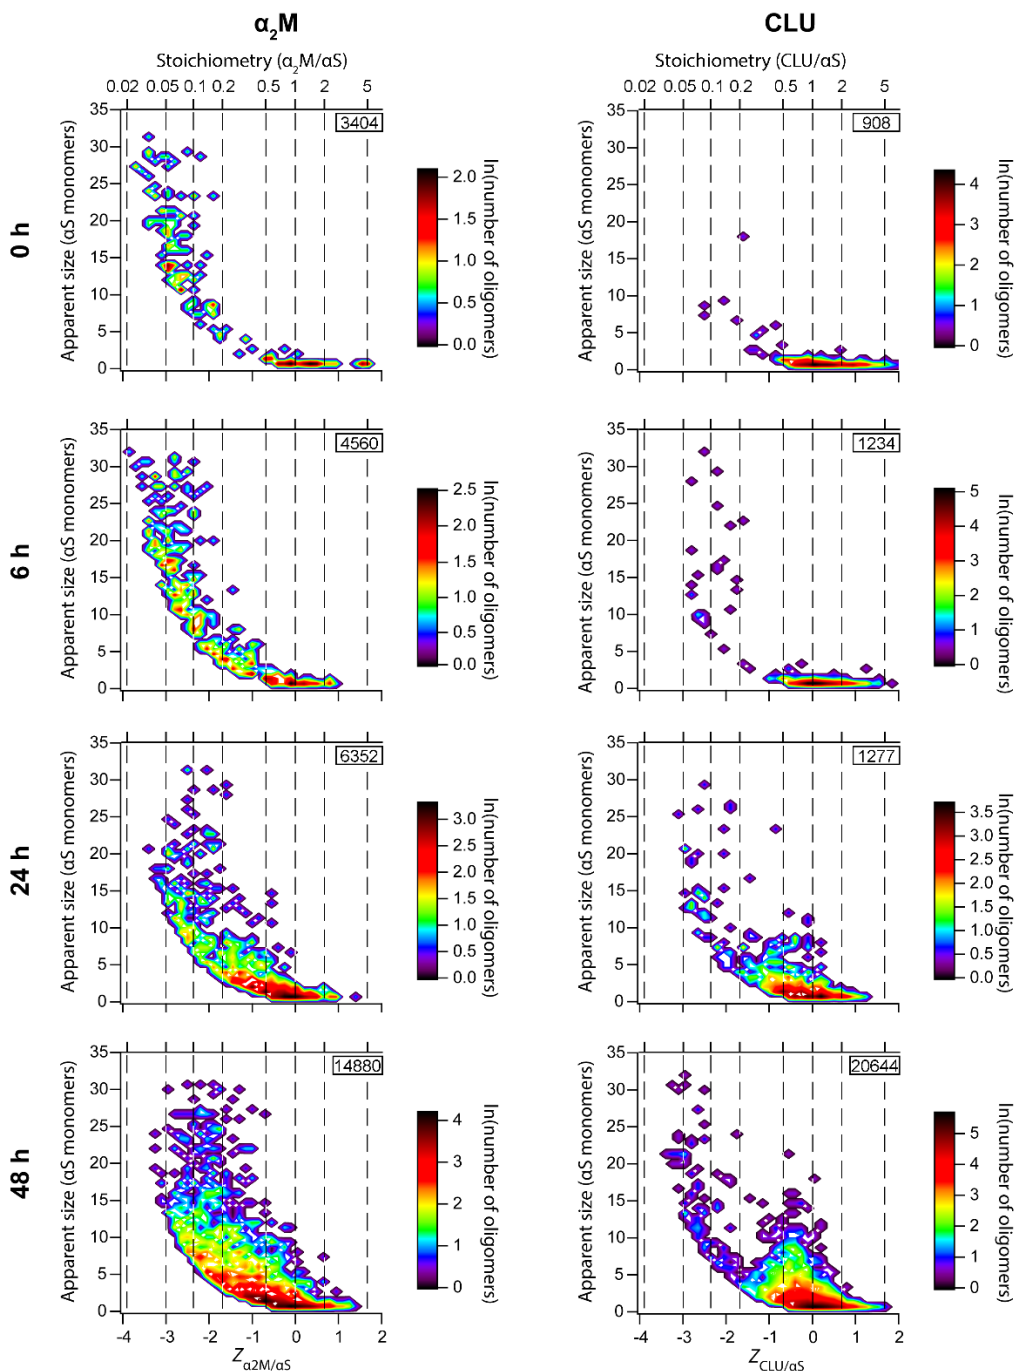

**Figure S2.** Related to Figures 1 and 2.  $\alpha\text{S}^{\text{A90C}}$ -AF488 (70  $\mu\text{M}$ ) and either  $\alpha_2$ M-AF647 (0.7  $\mu\text{M}$ ; left column) or CLU-AF647 (0.7  $\mu\text{M}$ ; right column) were co-incubated at 37  $^\circ\text{C}$ , with shaking at 200 rpm, in PBS (pH 7.4). Samples were taken from the aggregation reaction at the indicated times and the formation of  $\alpha$ S-chaperone complexes was quantified by single-molecule TCCD.  $Z_{\text{chaperone}/\alpha\text{S}}$  represents the logarithm of the apparent ratio of chaperone to client in each oligomer. The numbers in the inserts indicate the number of complexes represented in the plot. Data shown are representative of at least three separate experiments.

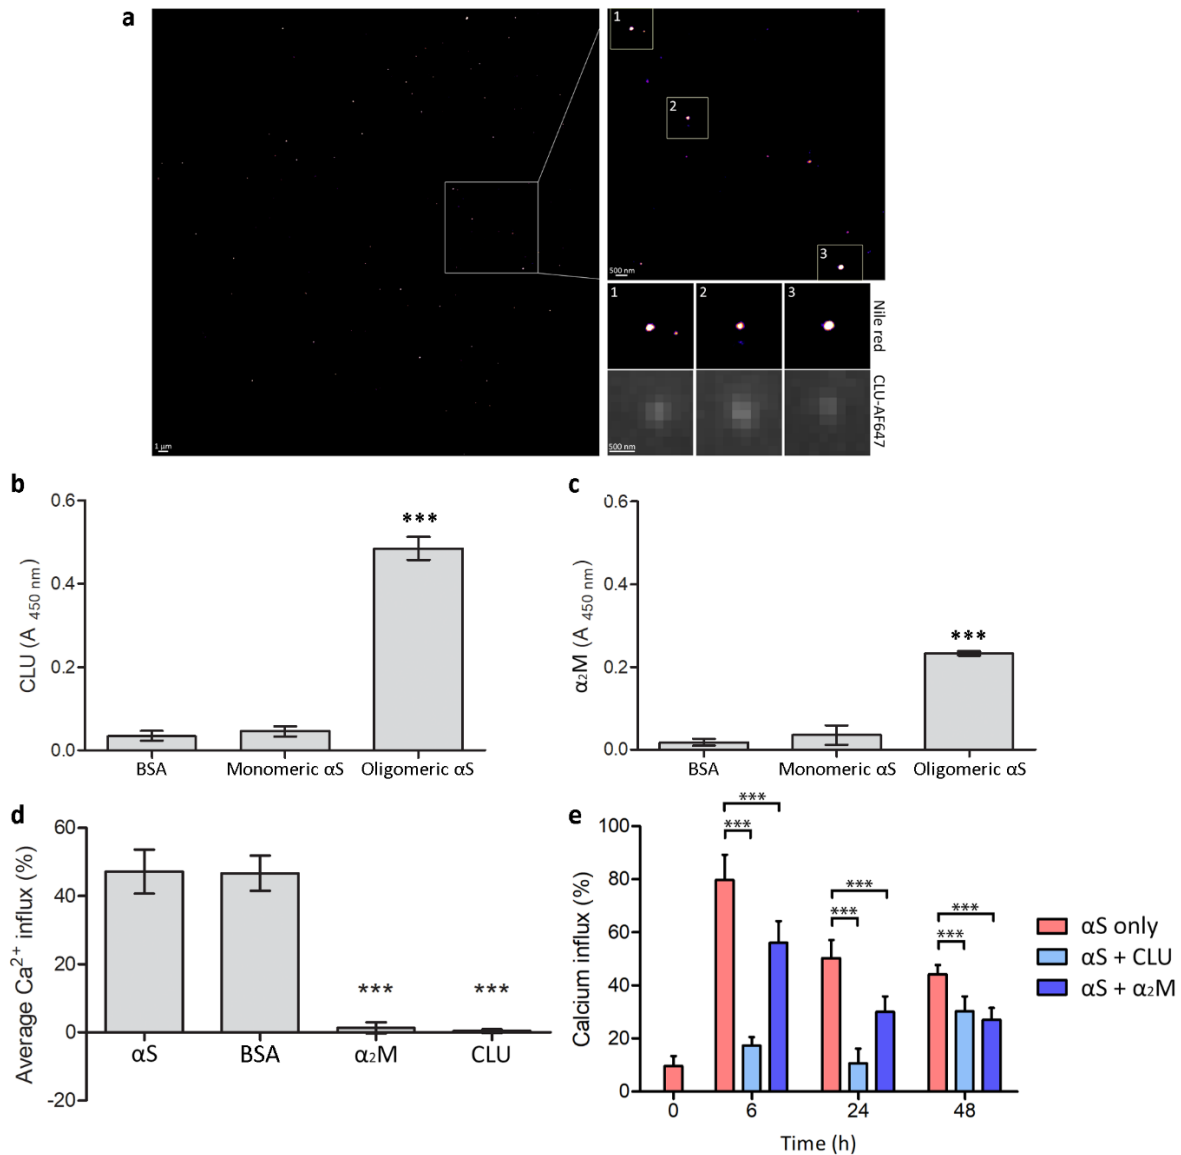

**Figure S3. Related to Figure 3. (a)** Monomeric  $\alpha$ S was incubated at a concentration of 70  $\mu$ M under aggregating conditions for 9 h. Aliquots were taken from the aggregation reaction and diluted to a concentration of 3  $\mu$ M in PBS with 5 nM Nile red for super-resolution imaging. Small aggregates consistent with the expected appearance of oligomers were observed (see the three zoomed panels labelled ‘Nile red’). These aggregates were preincubated with CLU-AF647 for 5 min before imaging; panels labelled ‘CLU-AF647’ are images of the same region as the super-resolution Nile red image but show the diffraction-limited fluorescence of colocalised CLU-AF647. **(b and c)** BSA, monomeric  $\alpha$ S or  $\alpha$ S incubated under aggregating conditions for 9 h (oligomeric  $\alpha$ S) were adsorbed to a microplate. After BSA blocking and incubation with the indicated chaperone the quantity of bound (b) CLU or (c)  $\alpha$ 2M was measured by ELISA. \*\*\* p < 0.001; values shown are means  $\pm$  SD of three independent experiments. **(d)**  $\alpha$ S was incubated under aggregating conditions for 9 h. Aliquots were removed from the aggregation reaction and samples of  $\alpha$ S were diluted and added to Cal-520-containing vesicles after preincubation in the presence or absence of BSA,  $\alpha$ 2M or CLU at equimolar concentrations to  $\alpha$ S (50 nM). Unlike  $\alpha$ 2M and CLU, BSA did not counteract the membrane permeability induced by  $\alpha$ S. Data shown are means  $\pm$  SD of 9 fields of view (at least 1000 vesicles); \*\*\* p < 0.001. **(e)** CLU and  $\alpha$ 2M reduce  $\alpha$ S-induced membrane disruption.  $\alpha$ 2M or CLU (700 nM) was incubated with  $\alpha$ S (70  $\mu$ M) for 48 h under aggregating conditions. At the time-points taken both  $\alpha$ 2M and CLU decreased the vesicle permeabilisation caused by  $\alpha$ S aggregates. Data shown are means  $\pm$  SD of 16 fields of view (at least 800 vesicles); \*\*\* p < 0.001.
